# Supplementary material for: The Female Athlete Triad—the impact of running and type of diet on the regularity of the menstrual cycle assessed for recreational runners
Source: PeerJ. 2022 Mar 2;10:e12903. doi: 10.7717/peerj.12903 (PMC8898003; doi:10.7717/peerj.12903)
Supplement: Supplemental Information 1 [file peerj-10-12903-s001.xlsx]

## Sheet: General
Master_Nr	Grupa	Year of birth	Age	Height	Weight	BMI	How long have you been running for?	What is the minimum distance you run? [km]	What is the maximum distance you run? [km]	What is the minimum number of times you run in a week?	What is the maximum number of times you run in a week?	What is the minimum number of hours for one run?	What is the maximum number of hours for one run?	At what age did menstruation begin for you?	How long is your monthly cycle? 1 - 24 days or less, 2 - 25-31 days, 3 - more than 31 days	For how long does your monthly bleeding last?	How many regular cycles have you had in the last 12 months? (0 - all were irregular)	Is your period: 1 - painless, 2 - painful but only at the beginnning, 3 - painful throughout	Does training during menstruation have an effect on the level of pain? 1 - YES - it lessens the pain, 2 - YES - it increases the pain, 3 - NO 4 - I don’t train during my period	How would you describe your period pain on a scale of 1-10 (1 = the pain is almost negligible, 10 = unbearable pain )	Have you ever missed your period for a long time after a period of regular bleeding? 1 – Yes, for less than 3 months, 2 – Yes, for between 3 and 6 months, 3 – Yes, for more than 6 months, 4 - I have never had such a situation	Do you know the cause of your menstrual disorders? (give details	Do you experience spotting between menstruation? YES/NO	Do you use hormonal contraception?	Do you use a special diet for athletes e.g.. low calorie, high protein, vegetarian? YES/NO If yes, which diet?	What is the minimum number of litres of water you drink in a day?	What is the maximum number of litres of water you drink in a day?
1	RUNNER	2004	16	167	84	30.1194	1	5	10	2	3	1	1.5	9	2	4	4	2	4	6	1	2	0	0	1	2
2	RUNNER	2004	16	170	60	20.7612	2	10	21	5	6	1	2	16	1	5	12	2	4	3	4	3	0	0	1	1.5	3
3	RUNNER	2003	17	170	51	17.6471	12	5	10	3	3	2	2	12	2	4	14	1	5	0	4	2	1	0	0	2
4	RUNNER	2003	17	173	60	20.0474	3	10	42	1	5	2	2	14	2	3	5	1	4	7	1	4	1	0	0	1	2.5
5	RUNNER	2001	19	173	88	29.4029	1	5	10	2	2	0.5	0.5	11	2	5	12	2	2	5	4		0	0	0	1.5
6	RUNNER	2001	19	173	64	21.3839	2	10	21	4	4	1	1	12	2	3	7	1	4	0	3	3	0	0	0	4
7	RUNNER	2001	19	168	90	31.8878	2	10	15	3	3	1	1	10	2	4	12	2	2	6	4		0	0	1	2
9	RUNNER	2001	19	171	105	35.9085	5	5	10	5	5	1	1	15	2	7	12	2	2	1	4		0	0	0	3
10	RUNNER	2001	19	151	40	17.5431	1	5	42	4	6	1	1	13	3	7	0	3	4	9	2	5	0	0	0	2
11	RUNNER	2001	19	176	57	18.4013	1	5	20	3	6	0.5	1	14	3	6	10	2	5	6	1	2	1	0	0	1.5
12	RUNNER	2001	19	167	54	19.3625	30	10	21	2	5	1	2	11	1	5	5	2	5	8	1	2	0	0	0	1
13	RUNNER	2001	19	160	62	24.2188	8	5	10	2	6	1	1	11	2	7	6	2	4	8	2	4	1	0	0	1.5
14	RUNNER	2001	19	158	52	20.83	1	5	10	3	3	1.5	1.5	15	2	7	11	2	5	10	4	5	0	0	0	1
16	RUNNER	2001	19	160	53.5	20.8984	1	10	20	3	3	1	1	11	2	7	11	2	4	6	1	2	0	0	0	2.5
17	RUNNER	2001	19	163	70	26.3465	20	5	42	2	4	1	1	13	2	7	3	2	4	3	1	4	1	0	0	2
18	RUNNER	2001	19	158	68	27.2392	4	5	21	3	3	2	2	12	2	5	12	2	2	7	1		0	0	0	1.5
19	RUNNER	2001	19	170	58	20.0692	10	5	10	2	6	1	1	14	1	7	12	2	4	4	4		0	0	0	1.5
20	RUNNER	2001	19	160	49	19.1406	20	5	10	1	3	1.5	1.5	13	2	7	12	2	4	8	1	2	0	0	0	3
21	RUNNER	2001	19	166	54	19.5965	10	5	10	4	6	1	1	11	2	6	12	2	4	5	2	3	0	0	0	1
23	RUNNER	2000	20	156	52	21.3675	5	10	15	3	4	1	1	13	2	6	12	2	1	5	4		1	0	1	1.5
24	RUNNER	2000	20	162	46	17.5278	1	5	20	4	4	1	1	13	2	5	9	3	4	7	2		0	0	0	2
25	RUNNER	2000	20	164	58	21.5645	2	5	21	5	7	1	1	9	3	6	5	1	4	0	3	3	0	0	0	2
27	RUNNER	2000	20	170	52	17.9931	8	8	15	3	4	1.5	3	16	2	5	11	2	1	6	3	2	0	0	1	2	3
28	RUNNER	2000	20	162	54	20.5761	1	5	20	5	5	1	1.5	9	2	6	12	2	2	10	4	3	1	0	0	1	1
29	RUNNER	2000	20	164	60	22.3081	4	10	15	3	3	2	2	12	2	4	12	2	5	7	4		0	0	0	2
30	RUNNER	2000	20	165	54	19.8347	1	5	10	4	7	2	2	9	2	5	12	2	2	8	4		0	0	1	1	1.5
31	RUNNER	2000	20	175	75	24.4898	2	5	10	3	3	1	1	14	2	6	5	2	4	6	4		0	0	0	1
32	RUNNER	2000	20	161	54	20.8325	2	5	10	3	3	1.5	1.5	12	3	5	12	2	2	10	4		0	0	0	1.5	2
33	RUNNER	2000	20	162	53	20.1951	1	8	15	3	3	1	1	12	2	6	11	2	2	7	2	4	1	0	0	2
34	RUNNER	2000	20	155	50	20.8117	3	20	42	3	3	0.5	1	9	2	6	14	2	4	10	4		0	0	1	2
35	RUNNER	1999	21	170	57	19.7232	3	5	8	2	2	1	1	12	2	4	12	2	2	6	4		0	0	1	3
37	RUNNER	1999	21	163	55	20.7008	15	10	21	3	3	1	1	12	2	6	12	2	5	5	4		1	0	0	1.5
39	RUNNER	1999	21	174	53	17.5056	6	15	50	6	4	1	2	15	2	4	10	1	1	6	1	1	0	0	1	3
40	RUNNER	1999	21	168	63	22.3214	25	5	21	4	5	1.5	1.5	13	2	6	10	2	1	7	1		0	0	0	1	1.5
41	RUNNER	1998	22	157	55	22.3133	5	10	21	3	4	1	1.5	10	2	5	12	1	4	5	2	2	0	0	0	2
42	RUNNER	1998	22	176	67	21.6296	4	10	15	3	3	2	2	14	1	4	8	1	2	2	1	4	1	0	0	1
44	RUNNER	1998	22	172	54	18.2531	6	5	10	2	4	1	2	16	2	5	10	3	1	6	1	4	0	0	0	2
45	RUNNER	1998	22	163	56	21.0772	4	10	42	5	5	1	1.5	15	2	5	0	1	4	1	2	1	0	0	1	2	2.5
46	RUNNER	1998	22	165	47	17.2635	2	3	9	3	3	1	1	12	2	7	9	3	1	6	4		0	0	0	2.5
47	RUNNER	1998	22	155	48	19.9792	11	5	15	3	4	1	2	11	2	4	9	2	1	7	1	2	1	0	0	1
48	RUNNER	1997	23	165	59	21.6713	4.5	5	20	2	3	0.5	2	12	3	4	11	2	4	2	1	3	0	0	0	1.5
49	RUNNER	1997	23	168	50	17.7154	2	5	20	4	4	1	2	13	3	5	3	2	2	7	1	4	0	0	1	1	3
50	RUNNER	1997	23	174	63	20.8086	5	5	30	2	5	1	1	14	2	4	8	1	1	2	2	5	0	0	1	2.5
51	RUNNER	1997	23	176	77	24.858	25	10	42	2	4	0.5	0.5	14	2	5	10	2	5	8	4	2	0	0	1	2
53	RUNNER	1997	23	173	57	19.0451	2	10	15	3	6	1	1	13	3	5	2	2	4	7	1	4	0	0	1	1.5	3
54	RUNNER	1997	23	173	57	19.0451	2	10	23	3	5	1	1	13	3	5	12	2	4	7	1	4	0	0	0	2	2.5
56	RUNNER	1996	24	165	56	20.5693	2	3	5	5	5	1	1	12	2	5	3	2	1	6	4	4		0	0	1	1.5
58	RUNNER	1996	24	173	60	20.0474	2	5	10	6	6	0.5	1	12	2	5	12	2	2	7	1	5	0	0	0	1.5
59	RUNNER	1995	25	160	55	21.4844	3	5	12	3	5	1	1	16	3	5	6	2	4	5	1	2	0	0	0	1
60	RUNNER	1995	25	168	66	23.3844	7	10	21	5	6	1.5	1.5	12	2	4	12	2	4	4	3	3	0	0	1	2.5
61	RUNNER	1995	25	163	57	21.4536	7	5	42	3	4	1	3	12	2	3	13	2	1	7	2	3	0	0	1	1.5	2
63	RUNNER	1995	25	167	60	21.5139	4	5	10	4	4	1	1	9	1	7	10	2	1	10	4		1	0	1	2
64	RUNNER	1995	25	170	58	20.0692	10	10	10	4	4	0.5	0.5	19	3	5	5	2	4	6	1	1	0	0	0	2
65	RUNNER	1994	26	164	55	20.4491	10	10	21	3	3	0.5	0.5	12	2	5	12	2	5	6	4	2	0	0	0	1.8
67	RUNNER	1994	26	173	69	23.0546	2	5	10	2	3	0.5	1	11	1	7	3	2	4	8	4		0	0	0	1.5
68	RUNNER	1994	26	160	50	19.5312	10	5	42	5	5	1.5	2	13	2	6	12	2	2	8	3	3	0	0	0	2	3
69	RUNNER	1994	26	166	60	21.7738	7	10	30	4	6	1	1.5	13	2	7	12	2	4	6	3	3	0	0	1	2	3
72	RUNNER	1994	26	157	66	26.7759	2	5	10	4	6	1	1	15	2	6	6	2	4	8	1	5	1	0	0	2.5
74	RUNNER	1994	26	165	60	22.0386	12	10	42	5	5	0.5	1	12	2	7	12	2	4	9	4		0	0	0	1.7	2
75	RUNNER	1993	27	169	54	18.9069	6	5	10	1	3	0.5	1	9	2	5	10	2	3	2	4		1	0	1	2
77	RUNNER	1993	27	172	63	21.2953	2	5	15	3	3	0.5	0.5	13	2	7	12	2	4	9	4		0	0	0	1.5
78	RUNNER	1993	27	167	64	22.9481	5	5	10	3	3	1.5	1.5	12	2	5	5	2	4	4	2	2	0	0	1	1.5
79	RUNNER	1993	27	167	96	34.4222	2	10	12	4	5	1	1	11	2	3	6	2	4	8	1	4	0	0	0	3
80	RUNNER	1992	28	165	53	19.4674	4	5	21	5	6	1	1	13	3	7	8	2	4	8	2	1	0	0	0	1	1.5
81	RUNNER	1992	28	158	45	18.026	4	5	50	3	5	1	2	10	3	2	6	2	4	5	1	1	0	0	0	1	3
84	RUNNER	1992	28	173	67	22.3863	3	8	15	2	2	1	1	13	3	3	7	2	4	5	2	2	0	0	0	2.5
85	RUNNER	1992	28	170	63	21.7993	1.5	15	21	2	2	1	1	13	2	7	12	2	2	6	4		1	0	0	2
86	RUNNER	1991	29	161	49	18.9036	4	40	42	4	4	1	4	12	3	5	9	2	4	4	1	5	0	0	0	1.5	2
87	RUNNER	1991	29	176	65	20.984	4	10	21	3	3	1	2	13	2	2	8	2	4	4	1	3	1	0	1	2	3
88	RUNNER	1991	29	169	56	19.6072	9	5	5	6	6	1.5	1.5	15	2	5	12	2	1	2	2	5	0	0	0	1
89	RUNNER	1991	29	176	63	20.3383	4	5	21	3	3	1.5	1.5	13	2	3	9	2	4	7	1	3	1	0	1	2
90	RUNNER	1991	29	165	62	22.7732	12	5	20	2	2	0.5	1	15	2	5	12	2	4	8	4		0	0	0	1
91	RUNNER	1991	29	160	47	18.3594	30	5	10	3	3	1	2	14	2	5	10	2	4	3	4	1	0	0	0	1	1.5
92	RUNNER	1991	29	169	58	20.3074	10	5	10	3	3	1	2.5	12	3	4	9	2	2	6	1	1	0	0	0	2
93	RUNNER	1991	29	173	70	23.3887	1	10	10	3	4	1	1	13	2	3	11	2	4	6	1	4	1	0	0	1	1.5
94	RUNNER	1991	29	170	80	27.6817	4	10	15	2	4	1	1	15	2	5	8	2	2	3	2	4	1	0	0	2
95	RUNNER	1991	29	165	70	25.7117	13	5	10	3	6	1	1	12	3	7	10	2	2	6	1	2	0	0		2
96	RUNNER	1990	30	153	51	21.7865	7	5	13	4	6	1	1	13	2	6	8	2	1	9	4		1	0	0	3
97	RUNNER	1990	30	165	66	24.2424	5	10	21	4	4	1	1	17	2	3	12	1	4	2	1	4	0	0	0	2
98	RUNNER	1990	30	174	77	25.4327	2	5	15	2	3	0.5	1.3	13	2	3	9	2	2	6	4	5	0	0	0	1	2
99	RUNNER	1990	30	158	48	19.2277	1	12	21	3	3	1.5	1.5	13	2	5	12	2	4	4	4		1	0	0	1.5
100	RUNNER	1990	30	172	60	20.2812	4	5	25	2	3	1	2	12	1	3	3	2	4	6	1	5	1	0	0	1
102	RUNNER	1990	30	159	49	19.3821	4	5	15	3	3	1	2	13	2	3	8	2	4	7	4		0	0	0	1	1.5
103	RUNNER	1990	30	160	48	18.75	7	5	10	3	3	1	3	9	3	7	6	1	2	5	1	4	0	0	1	2
104	RUNNER	1990	30	171	65	22.2291	4	5	15	3	3	1.5	1.5	13	2	5	12	2	5	7	4	5	0	0	0	2
105	RUNNER	1990	30	172	68	22.9854	3	5	21	3	3	1	1	16	2	5	10	2	2	2	1	4	0	0	0	2
106	RUNNER	1990	30	168	52	18.424	6	5	10	3	3	1	2	15	2	5	10	3	1	6	1	4	0	0	0	2
108	RUNNER	1990	30	160	55	21.4844	4	5	5	2	4	0.5	0.5	14	2	6	12	3	5	6	4		0	0	0	2
109	RUNNER	1990	30	165	70	25.7117	3	10	21	5	5	0.5	1	12	2	5	12	3	4	8	4		0	0	0	1.5
110	RUNNER	1989	31	170	97	33.564	3	5	10	3	4	1	1	10	3	2	10	2	1	6	1	1	0	0	0	1	2
111	RUNNER	1989	31	160	63	24.6094	4	5	21	2	3	0.5	1.5	11	2	4	12	2	5	0	4		0	0	0	2	3
112	RUNNER	1989	31	160	58	22.6562	1	10	20	4	4	1	2	9	3	5	12	2	4	2	1	3	0	0	1	2.5	3
113	RUNNER	1989	31	165	53	19.4674	10	5	10	5	5	1.5	1.5	15	2	5	12	2	4	5	1	4	1	0	0	2
114	RUNNER	1989	31	165	57	20.9366	2	10	20	4	5	1	2	12	2	5	12	2	5	10	4	5	0	0	0	1.5
115	RUNNER	1989	31	172	63	21.2953	22	5	42	3	3	2	2	12	1	5	10	2	4	5	4		1	0	0	1
116	RUNNER	1989	31	171	61	20.8611	4	5	42	5	5	1.5	1.5	14	2	6	12	2	2	6	4		0	0	0	1.5
117	RUNNER	1989	31	168	76	26.9274	3	5	30	3	4	1	1	16	1	6	2	2	4	3	4		0	0	0	2	3
118	RUNNER	1989	31	176	89	28.7319	5	5	20	3	5	1	1	11	2	5	4	2	2	10	1	4	0	0	1	1
119	RUNNER	1989	31	170	74	25.6055	5	5	7	3	3	1	1	13	2	6	12	2	5	6	4		0	0	0	2
121	RUNNER	1988	32	170	55	19.0311	7	5	42	4	5	1	2	13	2	5	12	2	2	6	4		0	0	0	2	4
122	RUNNER	1988	32	171	75	25.6489	12	5	21	2	2	1	1	18	2	5	12	1	4	1	4		0	0	0	2.5
123	RUNNER	1988	32	160	56	21.875	1	5	18	3	5	1	1.5	14	2	4	12	1	4	2	4		0	0	0	2
124	RUNNER	1988	32	160	46	17.9688	6	5	10	2	2	1	2	16	2	5	10	2	4	4	1	4	0	0	0	2	4
125	RUNNER	1988	32	164	59	21.9363	3	5	21	3	3	0.5	0.5	12	2	4	9	2	4	8	3	2	0	0	1	1.5	2
126	RUNNER	1988	32	176	65	20.984	5	10	42	6	6	1	2	15	2	4	12	1	4	0	4		0	0	1	2
127	RUNNER	1988	32	167	60	21.5139	2	10	21	5	5	1	3	13	1	5	6	2	2	5	4		0	0	0	1
128	RUNNER	1988	32	170	64	22.1453	1	5	15	3	3	0.5	0.5	9	2	3	2	2	4	7	4		0	0	0	1.5	3.5
129	RUNNER	1988	32	171	70	23.939	2	10	10	3	4	1	1	11	2	3	11	2	4	3	4		1	0	1	3
130	RUNNER	1988	32	160	54	21.0938	5	5	10	2	5	1	1	13	2	6	9	2	1	8	1	5	1	0	0	1.5
132	RUNNER	1987	33	168	52	18.424	7	5	23	3	3	1	2	13	2	5	7	2	4	5	3	3	0	0	1	1.5	2
133	RUNNER	1987	33	170	55	19.0311	3	5	20	4	4	2	2	12	2	2	10	2	4	3	1	4	0	0	0	3
134	RUNNER	1987	33	170	65	22.4913	3	10	15	3	3	1	1.5	13	2	5	12	1	4	0	2	2	0	0	0	2	3
135	RUNNER	1987	33	160	58	22.6562	6	10	10	4	4	1	1	14	2	5	12	2	4	6	4		1	0	0	1
136	RUNNER	1987	33	160	61	23.8281	5	5	21	4	4	0.5	3	13	2	5	5	1	4	5	4		0	0	1	2
137	RUNNER	1987	33	176	73	23.5666	3	8	15	3	4	1	1	16	2	5	10	2	4	6	4		0	0	0	1
138	RUNNER	1987	33	168	61	21.6128	6	5	42	5	7	1.5	1.5	13	2	6	9	2	4	6	1	5	0	0	1	2	3
139	RUNNER	1987	33	160	60	23.4375	5	5	21	4	5	1	2.5	12	2	4	12	2	4	4	4	1	0	0	0	2
140	RUNNER	1987	33	178	56	17.6745	1	10	21	4	5	1.5	2.5	13	2	5	10	1	4	2	4	5	1	0	1	1.5	2
141	RUNNER	1987	33	164	58	21.5645	3	5	16	3	4	1	1	13	2	7	12	2	2	5	4		1	0	0	1.5
142	RUNNER	1987	33	172	74	25.0135	11	5	10	2	5	1	1	15	1	5	6	2	1	6	4		0	0	0	1
143	RUNNER	1987	33	166	60	21.7738	10	5	10	3	3	1	1	11	3	5	11	2	5	4	4	5	0	0	0	1.5
144	RUNNER	1987	33	166	60	21.7738	10	5	10	7	7	2	2	11	2	4	11	3	4	9	4		0	0	1	3
145	RUNNER	1986	34	167	64	22.9481	1	5	10	1	2	1	1	13	2	6	12	2	5	4	4		0	0	1	1.5
146	RUNNER	1986	34	171	54	18.4672	6	5	20	3	3	1	1.5	13	2	4	12	1	4	3	3	1	0	0	1	3	4
149	RUNNER	1986	34	165	55	20.202	2	5	10	5	5	1	1	13	2	3	12	1	4	1	4		0	0	0	2
151	RUNNER	1986	34	165	57	20.9366	1	10	10	4	4	1	1	13	2	3	3	1	4	2	4		0	0	0	1
152	RUNNER	1986	34	168	95	33.6593	1	5	10	3	3	1	1	12	2	4	10	2	4	4	1	5	0	0	0	3
153	RUNNER	1986	34	170	52	17.9931	6	5	20	2	4	2	2	14	1	7	12	2	2	7	4		0	0	0	1
159	RUNNER	1985	35	152	52	22.5069	7	5	42	4	5	1.5	1.5	16	2	4	12	1	4	4	2	5	1	0	0	2.5
161	RUNNER	1985	35	170	54	18.6851	2	5	10	3	3	1	1	13	2	4	12	1	4	1	4		0	0	0	1
162	RUNNER	1985	35	170	58	20.0692	2	5	30	2	4	0.5	3	11	3	5	9	2	1	6	4		1	0	0	1
163	RUNNER	1985	35	160	55	21.4844	6	5	21	4	4	0.5	1	13	2	2	0	2	4	5	4		0	0	0	1.5
165	RUNNER	1985	35	164	58	21.5645	5	20	42	1	4	1	1	14	3	7	12	2	4	1	1	4	1	0	0	1.5
166	RUNNER	1985	35	168	71	25.1559	1	5	7	2	3	0.5	1	13	2	5	12	1	4	2	4		1	0	0	1
167	RUNNER	1985	35	164	82	30.4878	5	5	5	2	3	1	1	12	2	3	8	2	5	8	1	1	1	0	0	2
168	RUNNER	1985	35	175	64	20.898	1	10	10	3	4	1	1	11	1	4	8	2	4	1	4		0	0	1	2.5
169	RUNNER	1985	35	162	69	26.2917	7	5	8	3	3	1	1	11	1	7	10	2	5	7	4		0	0	1	1.5
170	RUNNER	1984	36	163	52	19.5717	3	10	15	5	5	1	1	14	2	5	12	2	4	4	4		0	0	1	1.5
171	RUNNER	1984	36	164	58	21.5645	7	10	16	5	5	1	2	12	1	5	4	2	4	3	4		0	0	0	2
172	RUNNER	1984	36	159	55	21.7555	7	10	21	4	5	1	1	11	3	5	12	2	2	7	1	1	1	0	0	2
173	RUNNER	1984	36	173	62	20.7157	3	5	20	3	3	1	1	12	2	5	13	2	2	6	4		0	0	1	2
175	RUNNER	1984	36	160	73	28.5156	2	5	10	3	4	1	1	16	2	5	7	2	1	2	1	2	0	0	0	2.5
176	RUNNER	1984	36	184	72	21.2665	13	10	42	2	5	0.5	0.5	13	2	4	11	2	2	0	4		0	0	1	3
177	RUNNER	1984	36	184	72	21.2665	7	5	5	2	4	0.5	0.5	13	1	4	11	2	5	0	4		0	0	1	3
178	RUNNER	1984	36	168	63	22.3214	1	5	15	2	2	1	1	11	2	5	14	2	5	9	4		0	0	0	3
180	RUNNER	1984	36	164	55	20.4491	5	5	42	3	4	1	3	15	2	5	12	1	4	1	4		0	0	0	1	1.5
181	RUNNER	1984	36	168	55	19.487	6	5	10	4	5	1.5	1.5	14	3	5	12	1	4	3	4		0	0	0	1
182	RUNNER	1984	36	168	70	24.8016	3	10	15	4	4	1	1.5	14	2	5	12	1	4	1	4		0	0	0	2	3
184	RUNNER	1984	36	165	51	18.7328	3	5	15	5	5	0.5	1.3	13	2	3	9	1	4	1	1	4	1	0	1	0.5	1
185	RUNNER	1983	37	165	55	20.202	5	10	25	3	3	1	2	16	1	5	10	1	4	2	4		0	0	0	3
186	RUNNER	1983	37	153	47	20.0777	7	5	42	3	3	1	2	14	3	4	12	2	5	3	4		0	0	0	1.5
187	RUNNER	1983	37	175	64	20.898	2	10	21	4	4	1	3	15	1	5	9	1	4	0	4	3	0	0	1	2.5
189	RUNNER	1983	37	170	62	21.4533	4	5	12	6	6	1.5	1.5	16	2	4	12	1	4	8	4		1	0	1	2
190	RUNNER	1983	37	164	70	26.0262	5	5	10	1	2	1.5	1.5	13	3	3	10	1	4	1	1	5	0	0	1	2	3
191	RUNNER	1983	37	165	60	22.0386	1	3	5	1	1	0.5	0.5	10	2	5	8	2	5	8	4		0	0	0	1
192	RUNNER	1983	37	164	55	20.4491	5	10	42	2	4	0.5	3.5	12	2	6	12	2	1	5	4		0	0	0	1.5
193	RUNNER	1983	37	176	96	30.9917	2	5	5	3	3	1	1	14	2	5	3	3	1	8	4	5	0	0	0	3
194	RUNNER	1983	37	168	61	21.6128	4	5	15	3	4	0.5	1	12	2	5	10	1	4	4	1	5	0	0	0	2.5
196	RUNNER	1982	38	154	61	25.721	2	5	16	3	5	2	2	14	2	3	0	2	4	7	1	2	1	0	1	2
197	RUNNER	1982	38	166	62	22.4996	6	6	12	4	5	1	1.5	14	2	6	10	2	4	8	4		0	0	1	1.5
198	RUNNER	1982	38	171	50	17.0993	4	10	15	2	3	1	2	14	1	4	12	1	1	2	4		0	0	0	2
199	RUNNER	1982	38	160	56	21.875	5	5	15	3	5	1	2	14	2	5	12	2	1	5	1	4	0	0	0	2
200	RUNNER	1982	38	174	85	28.075	5	5	10	2	4	1	1	14	2	6	13	2	4	4	2	3	0	0	0	1
202	RUNNER	1982	38	160	57	22.2656	22	10	42	6	7	1	1	15	2	6	12	1	4	1	4		1	0	0	2	3
203	RUNNER	1982	38	163	70	26.3465	8	5	21	3	4	0.5	1	13	1	3	10	2	4	8	3	4	1	0	0	2
206	RUNNER	1982	38	162	53	20.1951	7	5	8	2	2	1	1	15	2	3	4	2	4	7	1	5	0	0	0	1
207	RUNNER	1982	38	168	49	17.3611	10	5	15	5	6	1	1	15	2	4	9	2	4	6	4	5	0	0	0	2
208	RUNNER	1981	39	160	70	27.3438	2	5	10	3	3	1	1	15	2	5	12	2	4	3	4		0	0	1	1
209	RUNNER	1981	39	170	63	21.7993	19	10	21	4	5	2	2	13	2	5	12	1	4	3	4		1	0	1	2
210	RUNNER	1981	39	160	57	22.2656	4	5	5	5	7	1.5	1.5	13	2	5	12	2	2	7	1	1	0	0	0	1
211	RUNNER	1981	39	160	53	20.7031	10	10	21	3	3	1	1	13	2	3	12	2	4	3	4		0	0	0	1.5
212	RUNNER	1981	39	180	67	20.679	5	5	10	3	3	1	1.5	12	3	5	12	2	2	6	4		1	0	0	3
213	RUNNER	1981	39	172	66	22.3094	13	5	10	4	4	0.5	0.5	13	2	5	12	2	5	0	4		0	0	0	1.5
214	RUNNER	1981	39	160	53	20.7031	1	5	30	1	3	1	1	13	2	3	12	2	2	3	4		0	0	0	1.5
216	RUNNER	1981	39	165	60	22.0386	3	5	24	3	4	1	1	14	2	5	12	2	2	6	4		0	0	0	1.5
217	RUNNER	1981	39	163	58	21.83	1	5	21	4	5	1	2.5	12	2	4	12	1	4	0	4		0	0	1	2
219	RUNNER	1981	39	164	63	23.4236	5	21	45	6	7	0.5	3	12	2	3	10	1	4	2	4	5	1	0	0	2.5
220	RUNNER	1980	40	167	72	25.8166	1	5	20	3	4	0.5	2.3	10	2	6	8	2	5	8	1	1	0	0	1	3	4
221	RUNNER	1980	40	156	60	24.6548	10	7	10	2	3	1	1	14	2	7	10	1	4	1	1	4	0	0	0	2
222	RUNNER	1980	40	162	56	21.3382	20	5	5	1	2	1	1	15	2	3	12	2	5	3	4		0	0	1	1.5
223	RUNNER	1980	40	165	55	20.202	3	5	10	3	4	1	1	13	2	4	10	2	1	3	1	4	0	0	0
224	RUNNER	1980	40	162	63	24.0055	7	5	15	4	4	0.5	0.5	13	2	5	12	3	2	8	1	5	0	0	0	1
225	RUNNER	1980	40	168	67	23.7387	6	5	15	4	4	1	1	13	2	5	5	2	4	8	1	2	1	0	1	2
227	RUNNER	1980	40	171	75	25.6489	2	5	21	2	4	1	3	14	1	4	12	1	4	1	4		0	0	0	2	2.5
228	RUNNER	1980	40	165	61	22.4059	4	10	40	1	6	1	1	14	3	6	10	2	4	7	4		0	0	0	1.5	2
229	RUNNER	1980	40	160	62	24.2188	8	5	10	1	2	1	2	14	2	5	11	2	4	0	4		0	0	0	1	2
230	RUNNER	1979	41	176	70	22.5981	2	5	42	6	6	0.5	0.5	13	2	4	12	1	4	4	4		0	0	0	2
231	RUNNER	1979	41	164	57	21.1927	3	5	5	2	5	1.5	1.5	14	2	4	10	2	5	5	4		0	0	0	1.5
232	RUNNER	1979	41	165	60	22.0386	3	5	10	5	5	1	1	11	2	5	12	3	4	2	2	5	1	0	1	1	2
235	RUNNER	1979	41	165	62	22.7732	4	5	10	4	4	2	2	14	2	4	8	2	1	7	2	5	1	0	0	2
238	RUNNER	1979	41	163	60	22.5827	4	7	10	2	3	1	1	18	2	4	12	2	4	3	4		0	0	0	2
241	RUNNER	1978	42	162	58	22.1003	1	5	21	3	3	1	2	12	2	5	12	1	4	1	4		0	0	0	2
243	RUNNER	1978	42	161	63	24.3046	2.5	10	40	4	4	1	4	13	2	4	12	1	4	1	4		0	0	0	2
244	RUNNER	1977	43	166	70	25.4028	12	5	15	2	3	1	1	15	2	4	12	2	4	10	1	4	1	0	0	1.5
245	RUNNER	1977	43	160	70	27.3438	6	6	12	3	4	1	1.3	13	2	4	12	1	4	3	1	3	1	0	0	1.5	2
246	RUNNER	1977	43	160	50	19.5312	4	10	20	3	4	1	2	11	2	6	12	2	1	3	4		0	0	0	1.5	2
247	RUNNER	1977	43	172	72	24.3375	4	10	42	2	3	1	2	13	2	5	12	1	4	0	1	1	0	0	0	2
248	RUNNER	1977	43	168	65	23.03	7	5	42	4	4	1	1	14	2	4	12	2	4	3	4		1	0	0	2.5
249	RUNNER	1976	44	162	55	20.9572	4	10	42	3	3	1	1	13	3	3	4	2	4	3	4		0	0	0	1
251	RUNNER	1976	44	166	65	23.5883	7	5	42	3	5	0.5	3	13	2	6	0	2	5	10	4		0	0	0	1
252	RUNNER	1976	44	160	50	19.5312	6	10	21	3	3	1	1.5	15	1	3	0	2	4	3	1	5	0	0	1	2	3
253	RUNNER	1976	44	164	63	23.4236	5	10	42	3	4	1	2	15	2	4	12	2	1	4	4		0	0	1	2	3
255	RUNNER	1975	45	176	66	21.3068	3	5	20	2	3	0.5	2	16	2	4	12	1	4	1	4		0	0	1	1.5	2
257	RUNNER	1974	46	173	70	23.3887	4	5	10	3	3	1	1	13	2	3	12	2	4	5	4		0	0	0	2
258	RUNNER	1974	46	179	84	26.2164	7	5	20	4	4	1	1	13	2	6	10	2	2	9	2	3	1	0	0	1	2
259	RUNNER	1974	46	163	59	22.2063	5	5	10	3	3	1	1	15	2	5	12	1	4	4	4		0	0	1	1
260	RUNNER	1974	46	164	69	25.6544	2	5	21	3	3	1	1	14	2	5	12	1	4	1	4		0	0	0	1
261	RUNNER	1974	46	158	68	27.2392	2	5	10	2	4	1	1.5	12	2	3	10	2	4	6	4		0	0	0	1.5
262	RUNNER	1974	46	168	74	26.2188	2	5	8	3	3	0.5	1	14	2	4	12	2	2	2	3	1	0	0	1	1.5	2
265	RUNNER	1973	47	165	66	24.2424	2	5	12	2	3	0.5	1.5	14	2	2	8	1	4	1	4		1	0	0	0.75	1.5
267	RUNNER	1973	47	160	58	22.6562	1	5	10	3	3	2	2	12	2	5	11	1	4	3	1	4	0	0	0	2
269	RUNNER	1972	48	167	65	23.3067	10	1.5	10	3	3	1	2.5	13	3	3	9	2	2	4	2	3	0	0	0	2	3
271	RUNNER	1971	49	162	72	27.4348	7	12	20	7	7	2	2	12	2	3	13	1	4	0	2	3	0	0	1	2
272	RUNNER	1971	49	170	58	20.0692	2.5	5	42	2	3	1	2	9	2	5	6	1	4	1	1	3	1	0	0	2	2.5
273	RUNNER	1970	50	164	65	24.1672	5	5	10	4	4	1	1	13	2	5	9	2	1	4	4		1	0	1	2
275	RUNNER	1969	51	168	48	17.0068	6	10	21	4	7	0.5	0.5	13	3	7	8	1	3	0	1		0	0	0	1.5
276	RUNNER	1964	56	164	70	26.0262	4	10	20	4	4	1.5	1.5	12	2	5	0	2	1	8	1	1	1	0	1	1.5
277	CONTROL	2000	20	162	54	20.5761								9	2	6	12	2		10	4		1	0	0	2	2
279	CONTROL	2000	20	175	55	17.9592								12	2	5	10	2		3	1	3	0	0	1	2	2
280	CONTROL	2000	20	167	54	19.3625								12	2	5	12	2		6	4		1	0	0	1	1
281	CONTROL	2000	20	175	75	24.4898								14	2	6	9	2		6	4		0	0	0	1	1
282	CONTROL	2000	20	161	47	18.132								16	2	6	12	2		5	4		0	0	0	1	2
283	CONTROL	2000	20	165	54	19.8347								9	2	5	12	2		8	4		0	0	0	1	1
284	CONTROL	2000	20	160	65	25.3906								13	1	9	11	3		8	3	2	0	0	0	3	3
285	CONTROL	2000	20	170	80	27.6817								12	2	7	12	2		7	4		1	0	0	2	3
286	CONTROL	2000	20	170	57	19.7232								13	2	6	12	2		8	4		1	0	0	1	1.5
287	CONTROL	2000	20	173	57	19.0451								13	2	7	9	2		5	1	3	0	0	0	2	2
288	CONTROL	2000	20	170	80	27.6817								15	2	5	8	2		3	2	2	1	0	0	1.5	2
289	CONTROL	2000	20	164	60	22.3081								12	2	4	12	2		7	4		0	0	0	1	2
290	CONTROL	2000	20	161	54	20.8325								12	3	5	12	2		10	4		0	0	0	1	1
291	CONTROL	2000	20	163	58	21.83								13	2	6	12	3		8	4		0	0	0	1	1
292	CONTROL	2000	20	173	61	20.3816								13	2	5	11	2		6	1	4	1	0	0	2	3
294	CONTROL	2000	20	164	66	24.539								12	2	4	11	2		3	4		0	0	0	2.5	2.5
297	CONTROL	2000	20	170	57	19.7232								17	3	7	12	2		8	2	5	0	0	0	2	2
298	CONTROL	2000	20	176	76	24.5351								10	2	5	12	2		8	4		1	0	0	2	2
299	CONTROL	2000	20	163	60	22.5827								15	2	6	10	2		5	2	1	1	0	1	1.5	1.5
300	CONTROL	1999	21	155	65	27.0552								12	2	3	12	2		7	3	1	0	0	0	1.5	1.5
301	CONTROL	1999	21	168	70	24.8016								11	2	6	9	2		9	4		0	0	0	2	2
302	CONTROL	1999	21	168	63	22.3214								13	2	6	10	2		7	4		0	0	1	1.5	2
303	CONTROL	1999	21	176	58	18.7242								11	2	5	12	2		8	4		0	0	0	2	2
304	CONTROL	1999	21	155	50	20.8117								12	3	7	12	2		1	1	4	0	0	0	1	1
306	CONTROL	1999	21	163	55	20.7008								12	2	6	12	2		5	4		1	0	0	0.5	1
307	CONTROL	1999	21	170	65	22.4913								14	2	6	10	2		6	2	3	0	0	0	1.5	1.5
308	CONTROL	1998	22	172	55	18.5911								13	2	5	12	1		0	4		0	0	0	1	1
311	CONTROL	1998	22	176	67	21.6296								14	2	4	8	2		2	4		1	0	0	1	1
313	CONTROL	1998	22	170	60	20.7612								12	1	4	12	2		6	4		1	0	0	1	2
317	CONTROL	1997	23	169	65	22.7583								12	2	5	12	2		5	1	1	0	0	0	2	2
319	CONTROL	1997	23	176	77	24.858								14	2	5	12	2		8	4		0	0	1	3	3
320	CONTROL	1997	23	165	80	29.3848								13	2	4	10	2		7	2	2	0	0	0	1	1
322	CONTROL	1996	24	173	60	20.0474								12	2	5	12	2		7	1	4	0	0	0	2.5	3
323	CONTROL	1996	24	176	70	22.5981								12	1	6	10	2		7	4		0	0	0	2	2
326	CONTROL	1995	25	165	80	29.3848								11	2	6	12	2		3	4		0	0	0	1	1
327	CONTROL	1995	25	160	72	28.125								14	2	4	12	2		8	4		1	0	0	1
328	CONTROL	1995	25	170	58	20.0692								19	2	5	12	2		6	1	2	0	0	0	2	2
329	CONTROL	1995	25	168	63	22.3214								13	2	5	12	2		7	4		0	0	0	2	3
330	CONTROL	1995	25	168	59	20.9042								12	2	5	9	2		7	1	1	0	0	0	1.5	1.5
332	CONTROL	1995	25	163	80	30.1103								12	2	5	12	2		7	1	1	0	0	0	1	1
333	CONTROL	1995	25	172	58	19.6052								16	2	7	11	3		6	1	2	0	0	0	1	1
335	CONTROL	1994	26	164	78	29.0006								13	2	6	12	2		4	4		0	0	0	1.5	1.5
336	CONTROL	1994	26	157	66	26.7759								15	2	6	10	2		8	1	2	1	0	0	2	2
337	CONTROL	1993	27	163	50	18.8189								12	2	5	12	2		6	4		0	0	0	1	1
338	CONTROL	1993	27	185	90	26.2966								10	2	6	12	2		4	4		0	0	0	2.5	2.5
339	CONTROL	1993	27	167	64	22.9481								12	2	5	12	2		4	2	2	0	0	1	1	1.5
340	CONTROL	1993	27	160	44	17.1875								14	2	7	12	2		9	4		0	0	0	1.5	1.5
341	CONTROL	1993	27	174	57	18.8268								14	2	6	12	3		5	2	1	0	0	0	2	2
342	CONTROL	1993	27	182	120	36.2275								13	3	7	12	2		6	1	2	0	0	0	1.5	1.5
343	CONTROL	1993	27	167	49	17.5697								14	3	7	12	2		8	1	1	1	0	1	1	1
344	CONTROL	1993	27	172	63	21.2953								13	2	7	12	2		9	4		0	0	0	0.5	1
346	CONTROL	1992	28	164	88	32.7186								10	2	7	4	2		6	4		0	0	0	3	3
347	CONTROL	1992	28	160	58	22.6562								13	3	6	12	2		5	4		0	0	0	1.2	1.2
349	CONTROL	1992	28	167	80	28.6851								12	2	5	9	2		4	2	1	0	0	1	1.5	1.5
350	CONTROL	1992	28	164	100	37.1802								11	2	6	11	2		8	2	4	0	0	0	0.5	0.5
351	CONTROL	1992	28	168	90	31.8878								13	2	4	8	3		6	3	1	1	0	0	2	2
352	CONTROL	1991	29	158	80	32.0461								14	2	5	12	2		4	3	1	1	0	1	2	2
353	CONTROL	1991	29	154	58	24.4561								12	2	5	12	2		1	3	1	0	0	0	1.5	2
354	CONTROL	1991	29	170	78	26.9896								12	2	3	8	2		3	4		0	0	0	1.5	1.5
356	CONTROL	1991	29	173	88	29.4029								12	2	4	11	2		6	4		1	0	0	2	2
357	CONTROL	1991	29	165	61	22.4059								14	2	5	12	1		0	4		1	0	0	0.7	0.7
358	CONTROL	1991	29	165	62	22.7732								15	2	5	12	2		8	4		0	0	0	2	2
359	CONTROL	1991	29	165	98	35.9963								12	2	6	6	2		8	4		0	0	0	1.2	2
360	CONTROL	1991	29	160	47	18.3594								14	2	5	10	2		3	4		0	0	0	1.5	1.5
361	CONTROL	1990	30	160	55	21.4844								14	2	7	12	3		6	4		0	0	1	2	2
362	CONTROL	1990	30	168	63	22.3214								10	3	5	12	2		3	4		0	0	0	1	1
363	CONTROL	1990	30	171	65	22.2291								13	3	5	12	2		7	4		0	0	0	1.5	1.5
365	CONTROL	1989	31	176	75	24.2123								13	2	7	10	2		6	4		0	0	1	1	1
367	CONTROL	1989	31	170	74	25.6055								13	2	6	12	2		6	4		0	0	0	1	1.5
368	CONTROL	1989	31	170	87	30.1038								13	3	5	10	2		6	4		0	0	0	2	2
369	CONTROL	1989	31	175	89	29.0612								17	2	5	12	2		8	1	4	1	0	0	2	2
370	CONTROL	1989	31	165	64	23.5078								14	3	6	11	2		2	4		0	0	0	1.5	1.5
371	CONTROL	1988	32	180	80	24.6914								12	2	7	12	2		8	1	1	0	0	0	1	1
373	CONTROL	1988	32	165	65	23.8751								13	2	7	12	2		1	1	2	1	0	1	3	4
375	CONTROL	1988	32	164	59	21.9363								12	2	4	10	2		8	1	2	0	0	0	1.5	1.5
376	CONTROL	1988	32	168	58	20.5499								13	2	5	11	2		8	4		0	0	0	1.5	1.5
377	CONTROL	1988	32	163	62	23.3355								13	2	5	11	2		3	1	2	0	0	0	2.5	2.5
378	CONTROL	1987	33	160	54	21.0938								13	2	6	9	2		8	1	4	1	0	0	2	2
379	CONTROL	1987	33	177	83	26.493								14	2	3	12	3		8	1	2	0	0	0	1.5	1.5
380	CONTROL	1987	33	157	60	24.3418								11	2	6	12	2		1	4		0	0	0	2	3
381	CONTROL	1987	33	170	47	16.263								13	2	5	13	1		0	4		0	0	0	2	2.5
382	CONTROL	1987	33	172	74	25.0135								15	2	5	9	2		6	4		0	0	0	2	2.5
383	CONTROL	1986	34	175	83	27.102								16	2	6	12	3		7	4		0	0	0	1	1
384	CONTROL	1986	34	170	52	17.9931								14	1	7	12	2		7	4		0	0	0	1.5	1.5
385	CONTROL	1986	34	164	64	23.7954								10	2	5	12	2		7	3	3	0	0	0	1.5	1.5
386	CONTROL	1986	34	168	95	33.6593								12	2	4	10	2		4	1	2	0	0	1	2.5	2.5
387	CONTROL	1986	34	159	60	23.7332								13	2	7	12	2		1	4		0	0	0	1.5	2
388	CONTROL	1985	35	148	48	21.9138								11	2	6	12	2		6	4		0	0	0	1	1
389	CONTROL	1985	35	167	68	24.3824								13	2	6	10	2		8	4		0	0	0	1.5	1.5
390	CONTROL	1985	35	162	69	26.2917								11	1	7	10	2		7	4		0	0	1	1.5	1.5
391	CONTROL	1985	35	169	63	22.0581								13	2	5	12	2		1	4		0	0	0	1	1
392	CONTROL	1985	35	167	80	28.6851								14	2	5	12	2		10	4		0	0	0	1	1
393	CONTROL	1985	35	164	70	26.0262								14	2	3	12	2		5	1	2	0	0	0	1	1
394	CONTROL	1984	36	184	72	21.2665								13	2	4	11	2		4	4		0	0	0	1.5	1.5
395	CONTROL	1984	36	163	57	21.4536								13	2	5	10	2		2	4		0	0	0	1.5	1.5
396	CONTROL	1984	36	170	84	29.0657								11	2	4	12	2		4	1	1	1	0	0	1.5	2
398	CONTROL	1984	36	150	78	34.6667								11	2	3	12	2		3	4		0	0	0	1.5	1.5
399	CONTROL	1984	36	160	53	20.7031								11	2	6	12	2		5	4		1	0	0	2	2
400	CONTROL	1984	36	168	63	22.3214								11	2	5	14	2		9	4		0	0	1	1.5	1.5
401	CONTROL	1984	36	171	88	30.0947								11	2	6	12	1		0	4		0	0	1	1	1
402	CONTROL	1983	37	168	54	19.1327								14	2	5	10	2		5	4		1	0	0	2	2
403	CONTROL	1983	37	175	88	28.7347								14	2	5	14	2		4	4		0	0	0	0.5	0.5
404	CONTROL	1983	37	170	80	27.6817								15	2	5	9	2		3	4		0	0	0	1	1
405	CONTROL	1983	37	167	58	20.7967								14	2	5	10	2		2	4		0	0	0	1.5	1.5
406	CONTROL	1983	37	173	95	31.7418								10	2	5	12	1		0	1	1	1	0	1	1	1
408	CONTROL	1982	38	172	73	24.6755								12	3	5	12	2		4	1	4	0	0	0	3	3
411	CONTROL	1982	38	164	63	23.4236								12	2	5	12	2		1	4		1	0	0	1.5	1.5
412	CONTROL	1982	38	174	85	28.075								14	2	6	13	2		4	2	2	0	0	1	2	2
413	CONTROL	1982	38	160	50	19.5312								13	2	5	10	2		10	4		0	0	0	2	2
414	CONTROL	1981	39	172	57	19.2672								12	2	6	9	2		4	4		0	0	0	1.5	1.5
415	CONTROL	1981	39	166	73	26.4915								13	2	3	12	2		3	4		1	0	0	1	1
416	CONTROL	1981	39	160	53	20.7031								13	2	3	12	2		3	4		0	0	0	2	2
417	CONTROL	1981	39	160	53	20.7031								13	2	3	12	2		3	4		0	0	0	1.5	2
418	CONTROL	1981	39	164	64	23.7954								13	2	4	12	2		7	4		0	0	0	2	2
419	CONTROL	1981	39	170	72	24.9135								13	2	4	11	2		4	4		0	0	0	1	1.5
420	CONTROL	1981	39	172	66	22.3094								13	2	5	12	2		4	4		0	0	0	1	1
421	CONTROL	1981	39	180	67	20.679								12	2	5	12	2		6	4		1	0	0	1.5	1.5
422	CONTROL	1980	40	162	63	24.0055								13	2	5	12	3		8	1	5	0	0	0	1.5	1.5
423	CONTROL	1980	40	170	80	27.6817								13	3	2	12	2		3	3	5	0	0	0	1.5	1.5
424	CONTROL	1980	40	160	58	22.6562								19	2	5	12	2		5	4		0	0	0	0.5	0.5
425	CONTROL	1980	40	153	52	22.2137								12	2	5	10	1		0	4		0	0	1	1	1
426	CONTROL	1978	42	173	84	28.0664								15	2	4	12	1		0	4		0	0	0	1.5	1.5
427	CONTROL	1978	42	169	65	22.7583								10	2	6	12	2		6	4		0	0	0	2	2
428	CONTROL	1977	43	172	85	28.7317								13	2	5	12	2		4	4		1	0	0	1	1
429	CONTROL	1977	43	170	79	27.3356								15	2	5	12	3		10	4		0	0	0	1	1
430	CONTROL	1977	43	166	60	21.7738								11	2	5	11	2		4	4		0	0	0	1.5	2
431	CONTROL	1977	43	165	70	25.7117								14	2	5	13	1		1	1	1	0	0	0	2	2
432	CONTROL	1976	44	168	85	30.1162								13	3	5	10	3		8	1	2	1	0	0	1.5	1.5
434	CONTROL	1975	45	164	57	21.1927								14	2	4	10	2		5	4		0	0	0	1	1
435	CONTROL	1975	45	162	85	32.3884								11	2	5	12	2		2	4		0	0	0	2.5	3
437	CONTROL	1974	46	163	59	22.2063								15	2	5	12	1		0	4		0	0	0	1.5	1.5
438	CONTROL	1974	46	160	80	31.25								12	2	4	12	2		2	4		0	0	0	0.7	1
440	CONTROL	1974	46	176	70	22.5981								13	2	4	12	1		0	4		0	0	0	1.5	2
441	CONTROL	1973	47	168	65	23.03								13	2	5	12	2		1	4		0	0	0	1.5	1.5
442	CONTROL	1973	47	162	89	33.9125								11	2	5	12	1		0	1	5	1	0	0	2	2
443	CONTROL	1972	48	167	67	24.0238								13	2	6	12	2		7	4		0	0	0	1	1
444	CONTROL	1972	48	167	60	21.5139								15	2	6	10	2		5	2	2	1	0	0	1	1.5
445	CONTROL	1971	49	171	82	28.0428								15	2	7	12	2		1	4		0	0	1	1	1.5
446	CONTROL	1970	50	168	67	23.7387								13	2	5	12	2		8	1	1	1	0	0	1	1.5
447	CONTROL	1969	51	168	48	17.0068								13	3	7	8	2		1	1	1	0	0	0	1	1
448	CONTROL	1968	52	160	57	22.2656								13	2	5	12	2		7	4		0	0	0	1	1
449	CONTROL	1968	52	172	83	28.0557								15	2	5	11	2		2	4		0	0	0	2	3
450	CONTROL	1966	54	168	87	30.8248								13	2	5	12	2		5	4		0	0	0	1	1

## Sheet: Knowledge
NUMBER	Do you know what Female Athlete Triad is? If YES, please write
1	3 disorders that can be problematic for female runners
2	lack of menstruation
3	lack of menstruation
4	Amenorrhea dysmenorrhoea profuse menstruation
5	Amenorrhea, weight loss, osteoporosis
6	I know something. These are disorders in women who train a lot, who give 150% of themselves
7	One of the elements of the triad is the cessation of menstruation in intensively training women
8	is associated with gaining lower weight than recommended, which translates into hormonal disorders and amenorrhea.
9	There is a menstrual stop caused by a high frequency of training and I have killed the fatty tissue - necessary for exfoliation :)
10	I associate it with amenorrhea or weight loss? hormonal disorders?
11	maybe some disorders, which include 3 causes, including menstrual disorders, maybe dehydration, hormonal problems, I have no idea, really
12	Excessive effort and a restrictive diet cause weight loss (fat loss), hormonal disorders and amenorrhea occur, which may result in a decrease in bone density and susceptibility to fractures, especially fatigue.
13	I don't know exactly, I know it includes menstrual disorders
14	I don't know, I think these are menstrual disorders caused by intense training?
15	I don't know, I think, I suppose the symptom complex is caused by too much physical stress with too little being followed by nutritional factors. Maybe weight loss, amenorrhea, neurological / cardio disorders?
16	Low energy availability, menstrual disorders, decreased bone density
17	Probably some three symptoms - I bet on menstrual disorders, difficulties with getting pregnant and ...?
18	Perhaps a period disorder due to the length and intensity of training
19	Probably missing your period
20	Menstrual problems
21	Loss of bone mass, eating disorders, menstrual disorders
22	sport sometimes causes amenorrhea
23	female athletes do not have periods, hormonal disorders.
24	Sportswomen do not supply the body with enough energy in food and there is an energy deficit. So they provide too little energy with food in relation to the amount of training.
25	A series of changes in the organism's homeostasis caused by practicing sports
26	Yes
27	Yes I know a lot to write
28	Yes, I know: secondary amenorrhea, low bone density that can lead to osteoporosis.
29	yes, it is a body disorder associated with low energy availability (often also with very low levels of body fat), menstrual disorders (e.g. lack of them) and bone loss
30	Yes, menstrual disorders.
31	Yes, an eating disorder related to not eating enough
32	Yes. eating disorders, weight-too low, menstruation (atrophy, the pituitary stops producing the hormone.this leads to osteoporosis.)
33	This is a set of three symptoms found in active female runners: menstrual disorders, eating disorders, and osteoporosis
34	three sport-related symptoms lack of menstruation, poor revitalization and something with the bones
35	I know disorders caused by regular exercise, menstrual disorders, bone density and energy deficit
36	Disorders of the menstrual cycle, ailments related to the skeletal system, ailments related to the body's energy management
37	hormonal disorders
38	menstrual disorders
39	disorders of menstruation and eating
40	menstrual disorders
41	menstrual disorders
42	Menstrual and weight disorders and osteoporosis
43	Menstrual disorders
44	menstrual disorders, but I don't know the details
45	Menstrual disorders, decreased bone density, decreased energy
46	eating disorders and menstruation
47	Disorders caused by too much exercise and fat loss?
48	eating and menstrual disorders in athletes
49	Atrophy of menstruation, decreased bone density, eating disorders
50	Fatigue, overtraining, hormonal disorders, osteoporosis
51	I do not know
52	I do not know
53	I heard something but did not go deeply into the subject
54	Perhaps menstrual problems, urinary incontinence, metabolic disorders
55	Not
56	Not
57	Nope
58	Nope
59	Nope
60	Not
61	Not
62	Not
63	Not
64	Not
65	I don't know ... I haven't heard. But I'll look for it in a moment
66	I have no idea
67	I have no idea
68	I have no idea about Chinese?
69	I have no idea about Chinese?
70	I have no idea, but I'd like to read it :)
71	I have no idea, but since Triad is probably the occurrence of 3 disorders 😁
72	No idea, not even trying to guess
73	I have no idea.
74	I did not hear
75	Haven't heard before. Now I know it's an eating disorder
76	I have not come across such a term
77	I do not know
78	I do not know
79	I do not know
80	I do not know
81	I do not know
82	I do not know
83	I do not know
84	I do not know
85	I do not know
86	I do not know
87	I do not know
88	I do not know
89	I do not know
90	I do not know
91	I do not know
92	I do not know
93	I do not know
94	I do not know
95	I do not know
96	I do not know
97	I do not know
98	I do not know
99	I do not know what is it
100	I do not know.
101	I do not know. Some combination of three disorders
102	No🤷‍♀️
103	hormonal disorders in the ketogenic diet? with a sharp loss of weight, with prolonged sharp exertion, dehydration?
104	I do not know
105	I do not know
106	I do not know
107	I do not know
108	I do not know
109	I do not know
110	I do not know
111	I do not know
112	I do not know
113	I do not know
114	I do not know
115	I do not know
116	I do not know
117	I do not know
118	I do not know
119	I do not know
120	I do not know
121	I do not know
122	I do not know
123	I do not know
124	I do not know
125	I do not know
126	I do not know
127	I do not know
128	I do not know
129	I do not know
130	I do not know
131	I do not know
132	I do not know
133	I do not know
134	I do not know
135	I do not know
136	I do not know
137	I do not know
138	I do not know
139	I do not know
140	I do not know
141	I do not know
142	I do not know
143	I do not know
144	I do not know
145	I do not know
146	I do not know
147	I do not know
148	I do not know
149	I do not know
150	I do not know
151	I do not know
152	I do not know
153	I do not know
154	I do not know
155	I do not know
156	I do not know
157	I do not know
158	I do not know
159	I do not know
160	I do not know
161	I do not know
162	I do not know
163	I do not know
164	I do not know
165	I do not know
166	I do not know
167	I do not know
168	I do not know
169	I do not know
170	I do not know
171	I do not know
172	I do not know
173	I do not know
174	I do not know
175	I do not know
176	I do not know
177	I do not know
178	I do not know
179	I do not know
180	I do not know
181	I do not know
182	I do not know
183	I do not know
184	I do not know
185	I do not know
186	I do not know
187	I do not know
188	I do not know
189	I do not know
190	I do not know
191	I do not know
192	I do not know
193	I do not know
194	I do not know
195	I do not know
196	I do not know
197	I do not know
198	I do not know
199	I do not know
200	I do not know
201	I do not know
202	I do not know
203	I do not know
204	I do not know
205	I do not know
206	I do not know
207	I do not know
208	I do not know
209	I do not know
210	I do not know
211	I do not know
212	I do not know
213	I do not know
214	I do not know
215	I do not know
216	I do not know
217	I do not know
218	I do not know
